# Supplementary material for: A landscape-scale assessment of tropical mammals reveals the effects of habitat and anthropogenic disturbance on community occupancy
Source: PubMed Central journal article supplement (PMC6474625; doi:10.1371/journal.pone.0215682), 2019-04-19

(a)

### Effect of dist. to rivers on MT occupancy

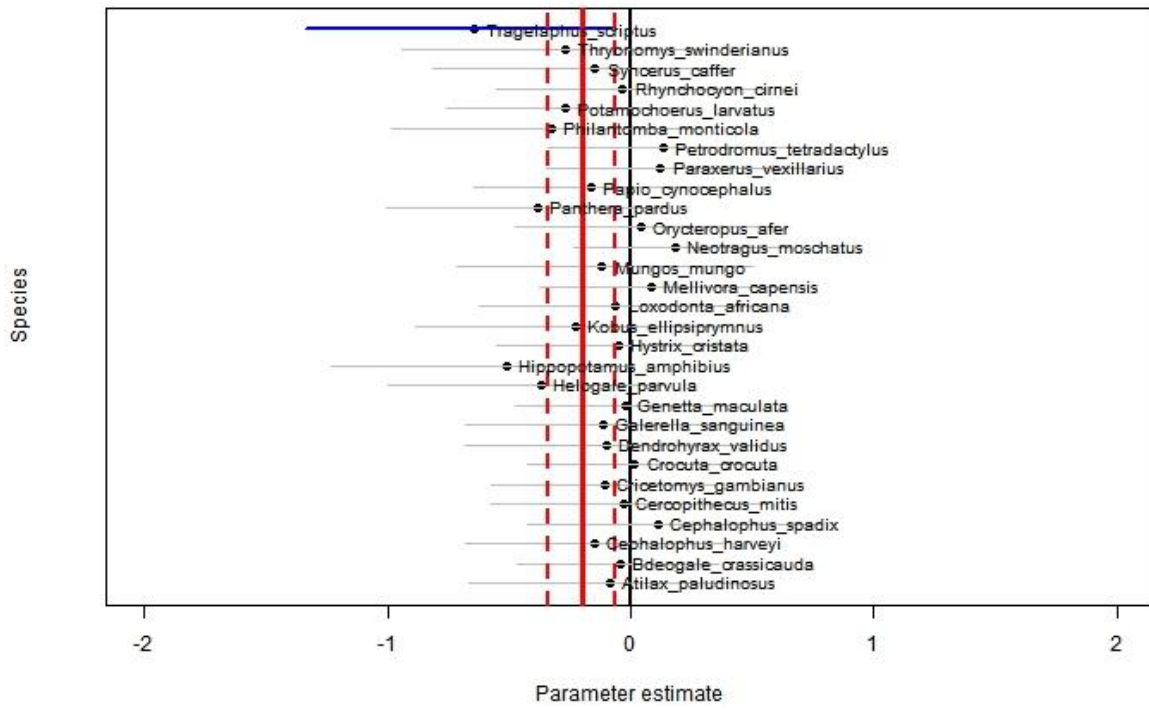

### Effect of dist. to rivers on MB occupancy

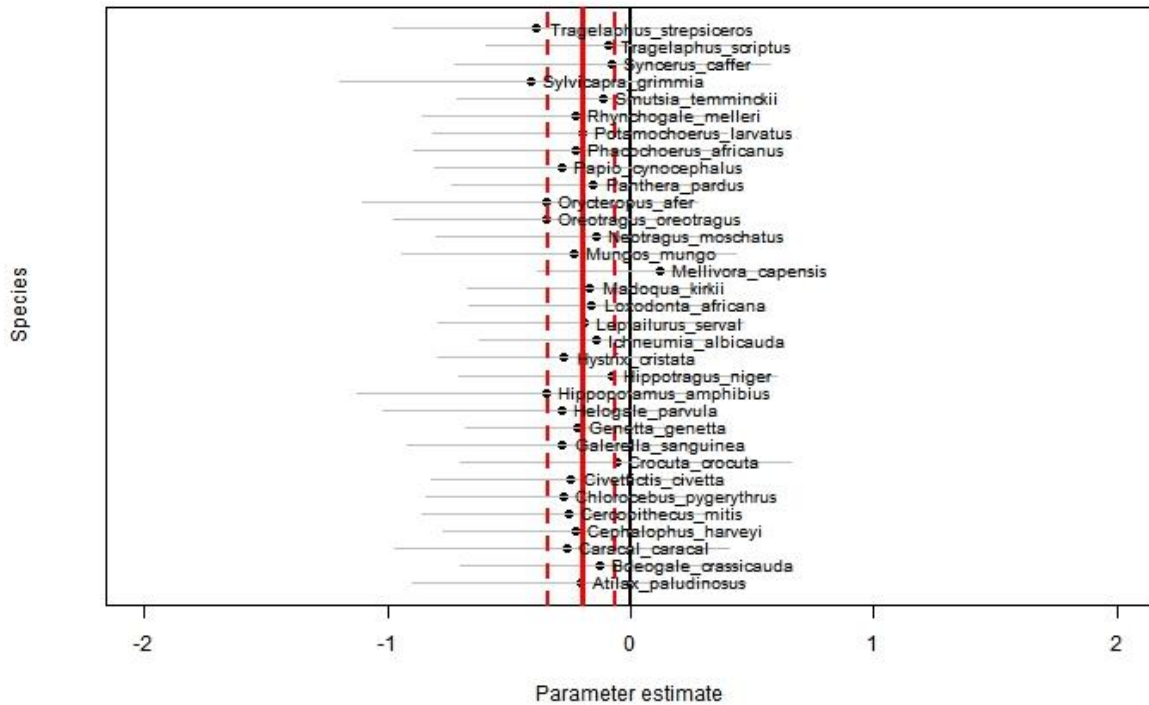

### Effect of dist. to rivers on LU occupancy

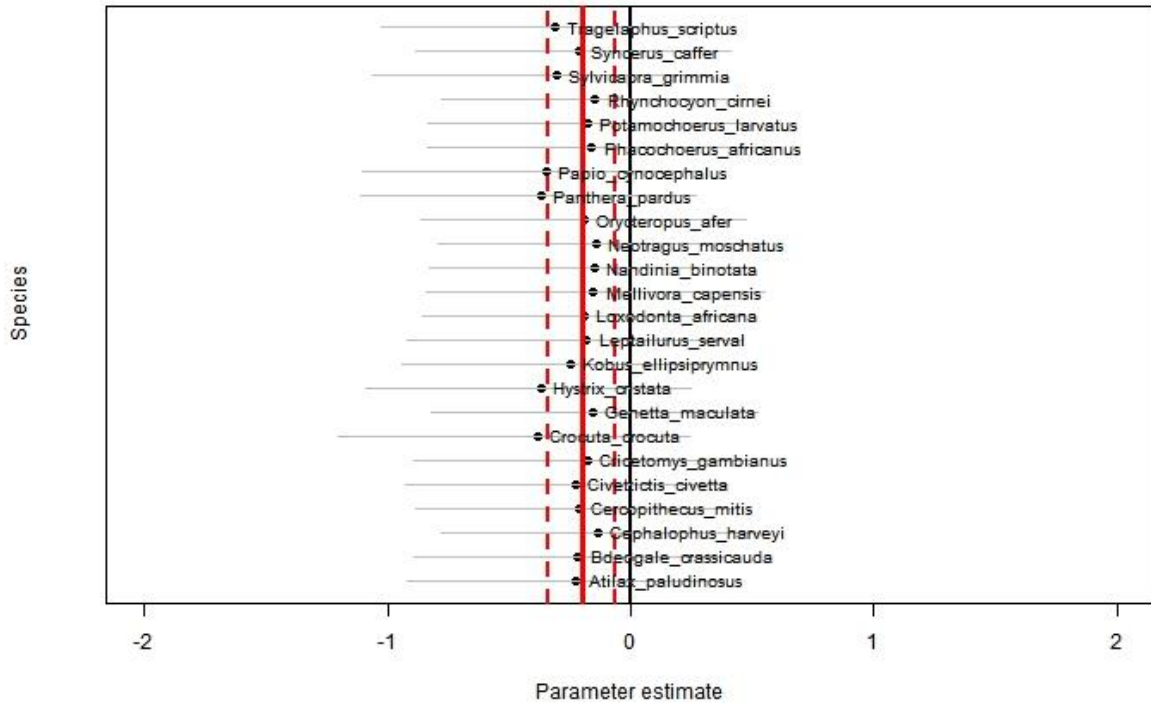

### Effect of dist. to rivers on ND occupancy

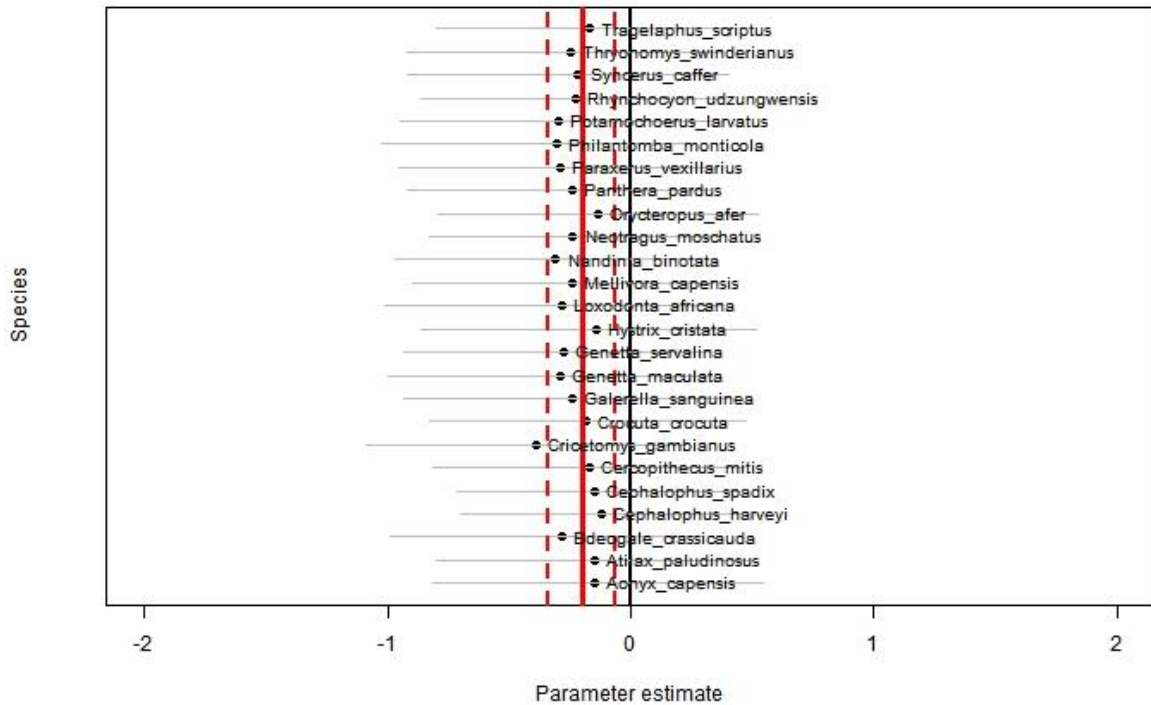

**Effect of dist. to rivers on MW occupancy**

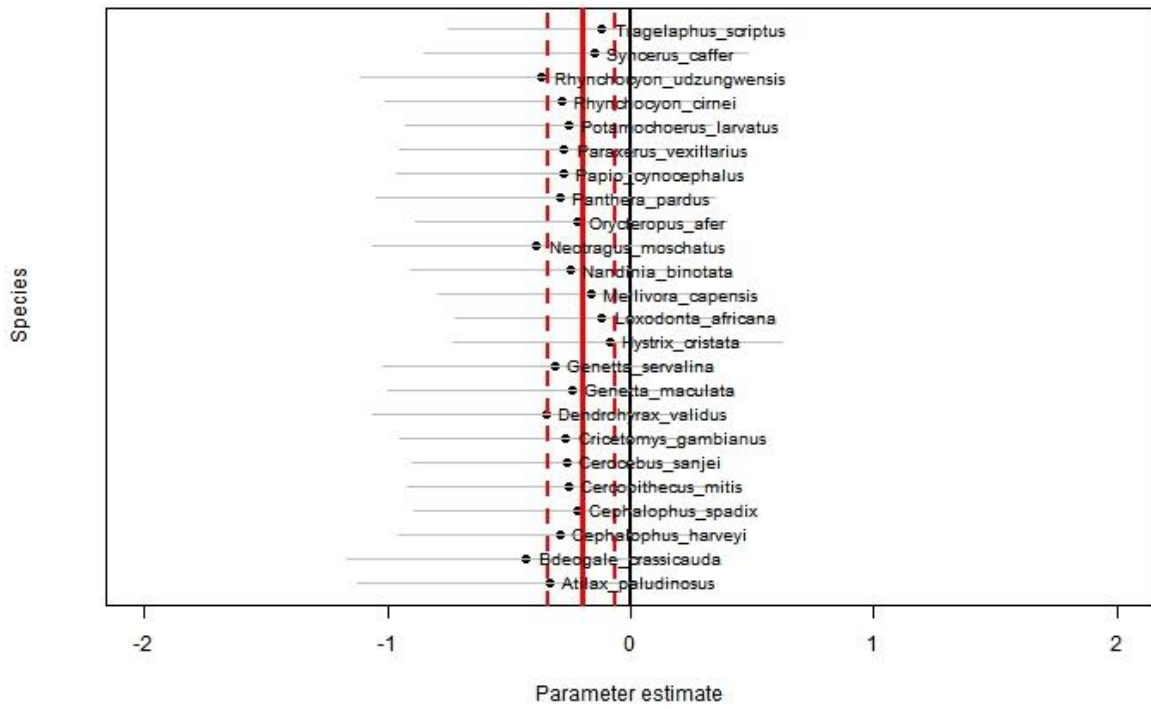

(b)

**Effect of dist. to settlements on MT occupancy**

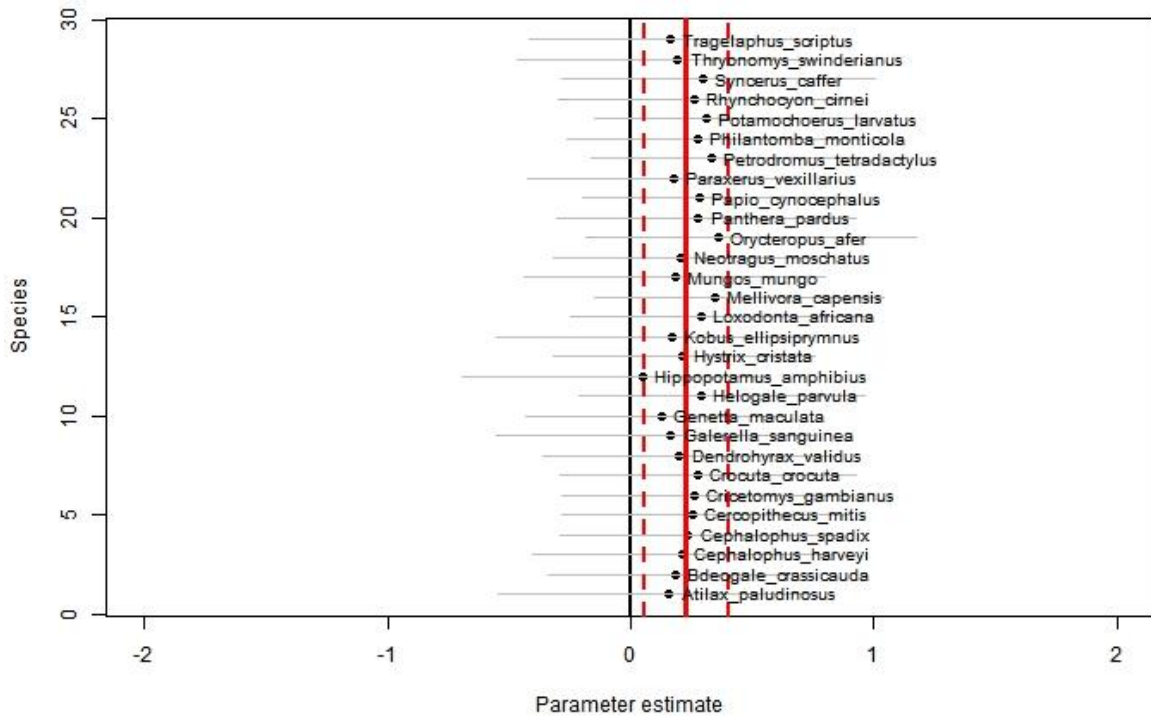

### Effect of dist. to settlements on MB occupancy

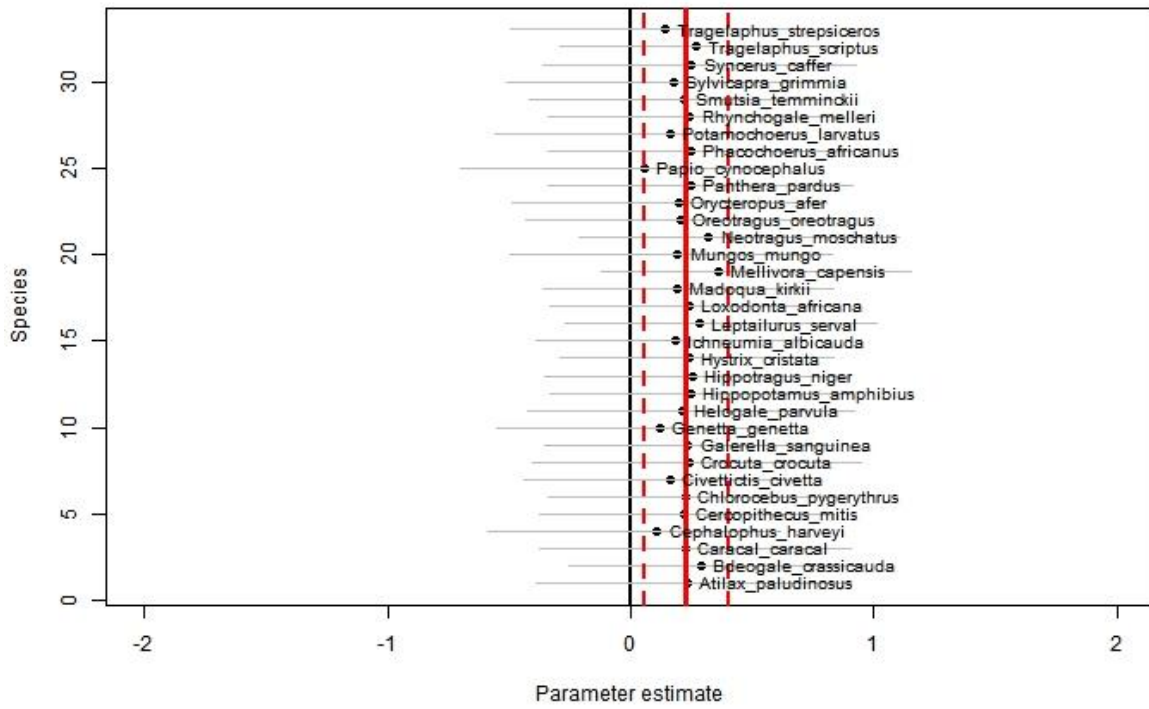

### Effect of dist. to settlements on LU occupancy

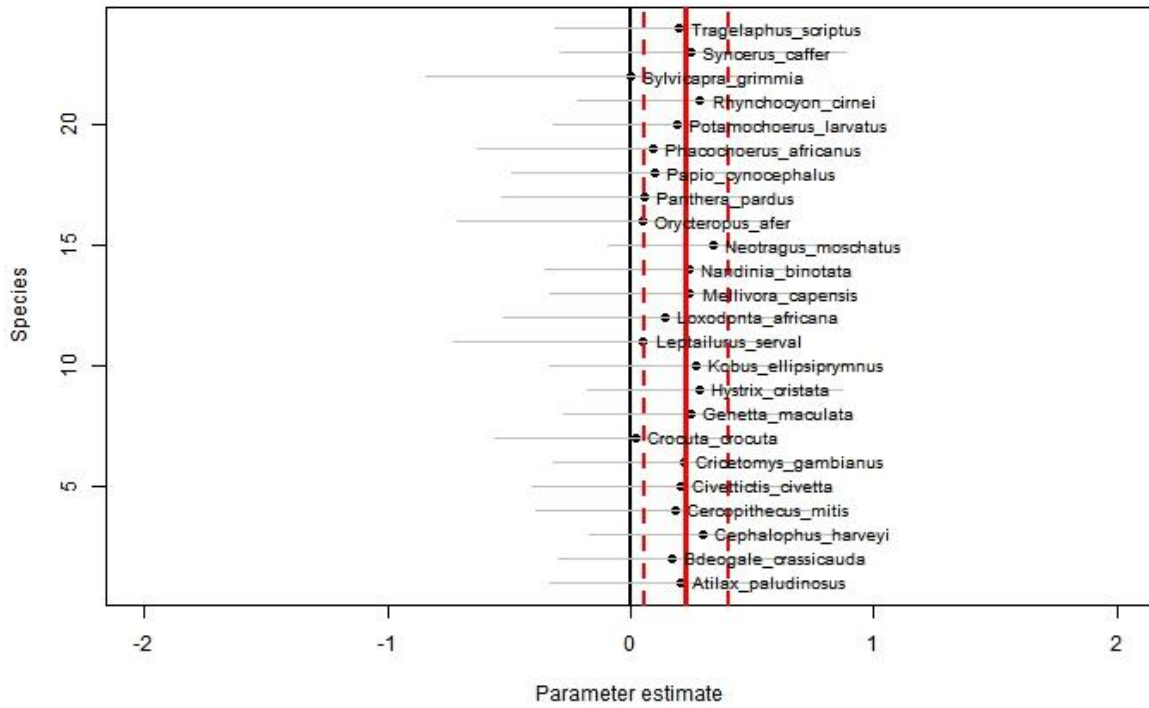

### Effect of dist. to settlements on ND occupancy

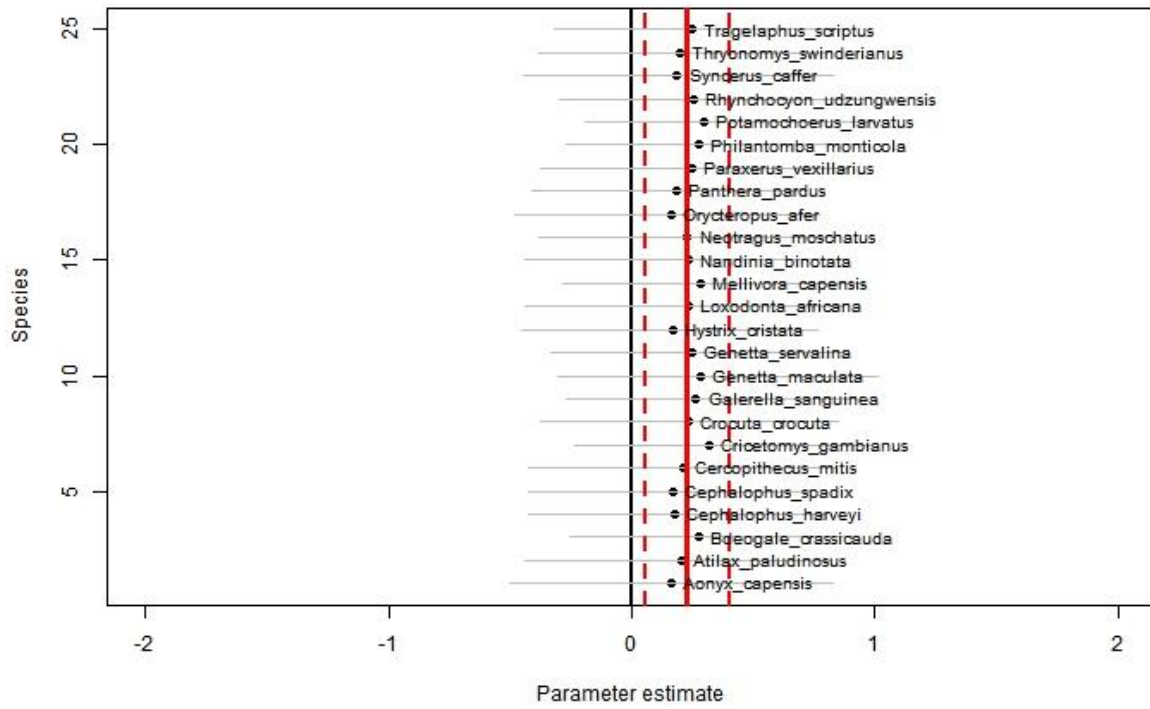

### Effect of dist. to settlements on MW occupancy

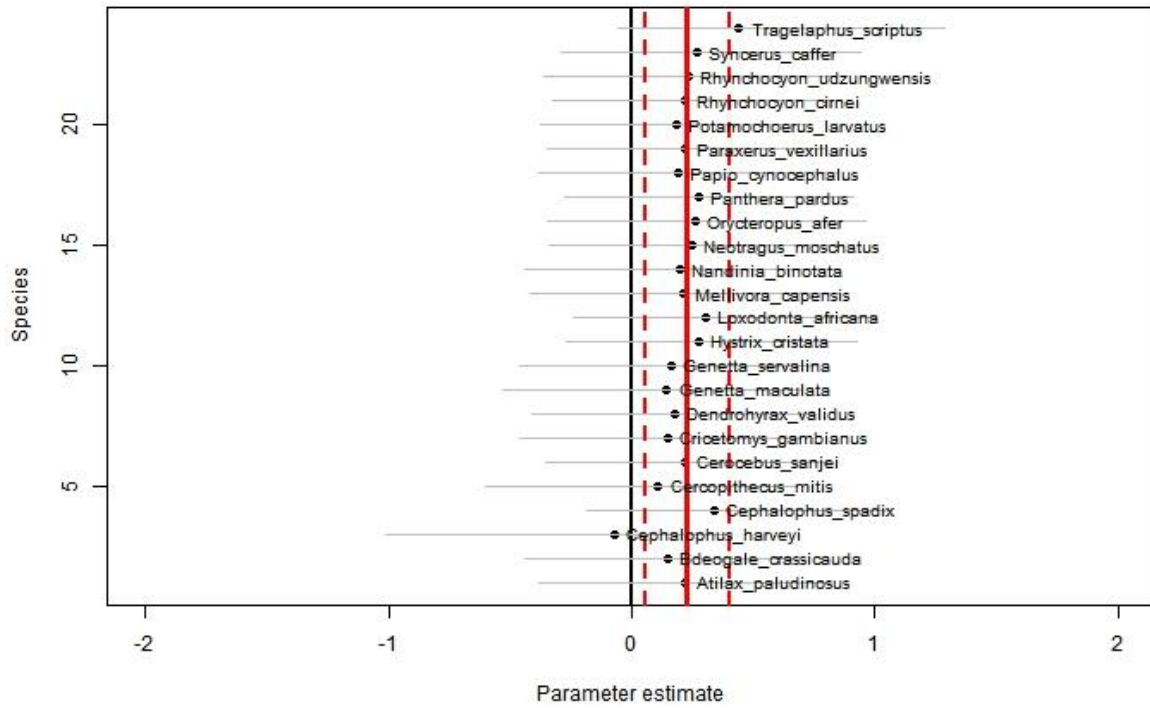

(c)

### Effect of dist. to settlements on MT detection

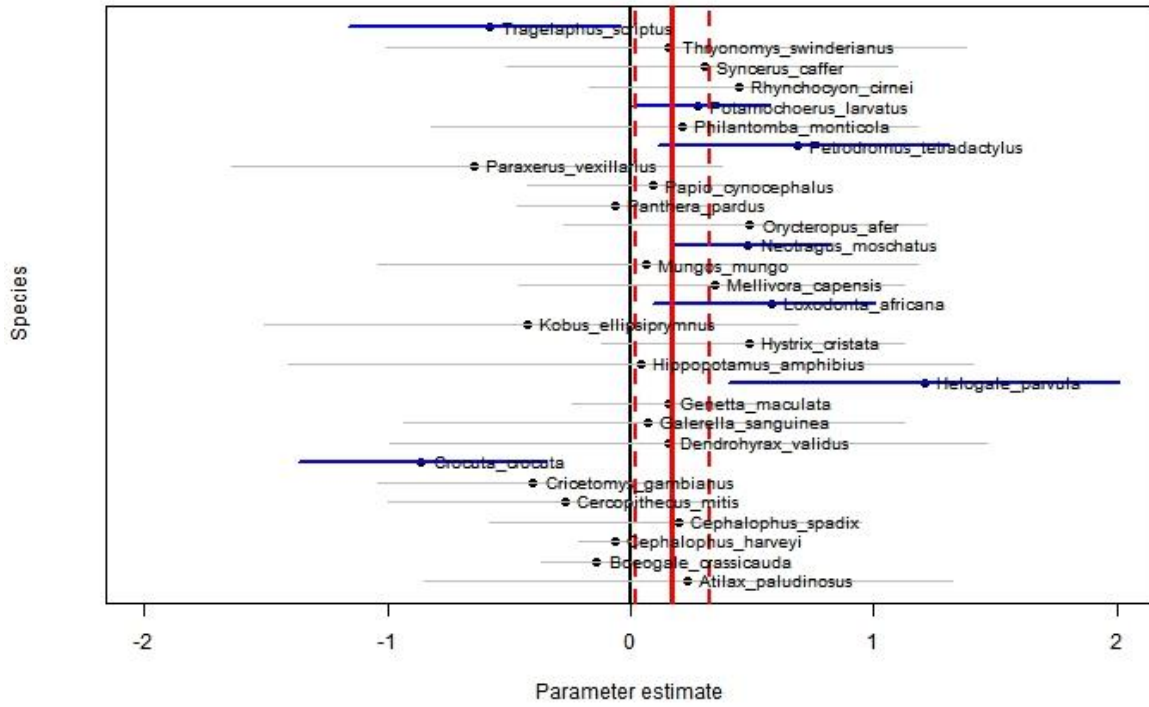

### Effect of dist. to settlements on MB detection

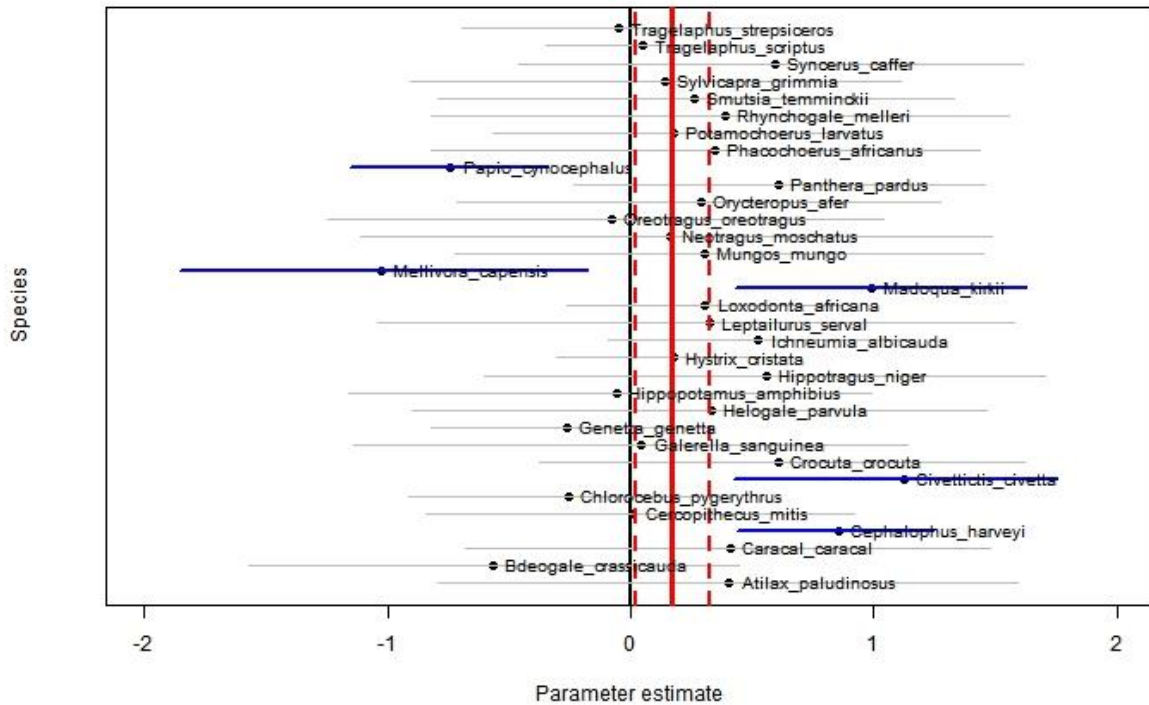

### Effect of dist. to settlements on LU detection

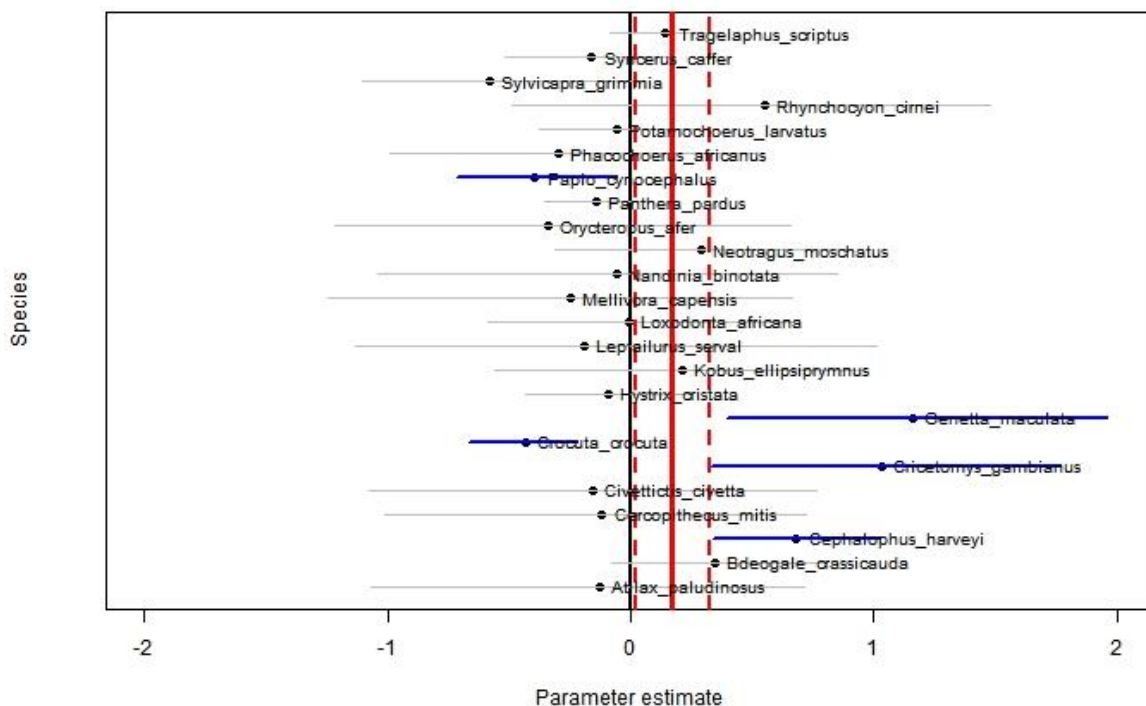

### Effect of dist. to settlements on ND detection

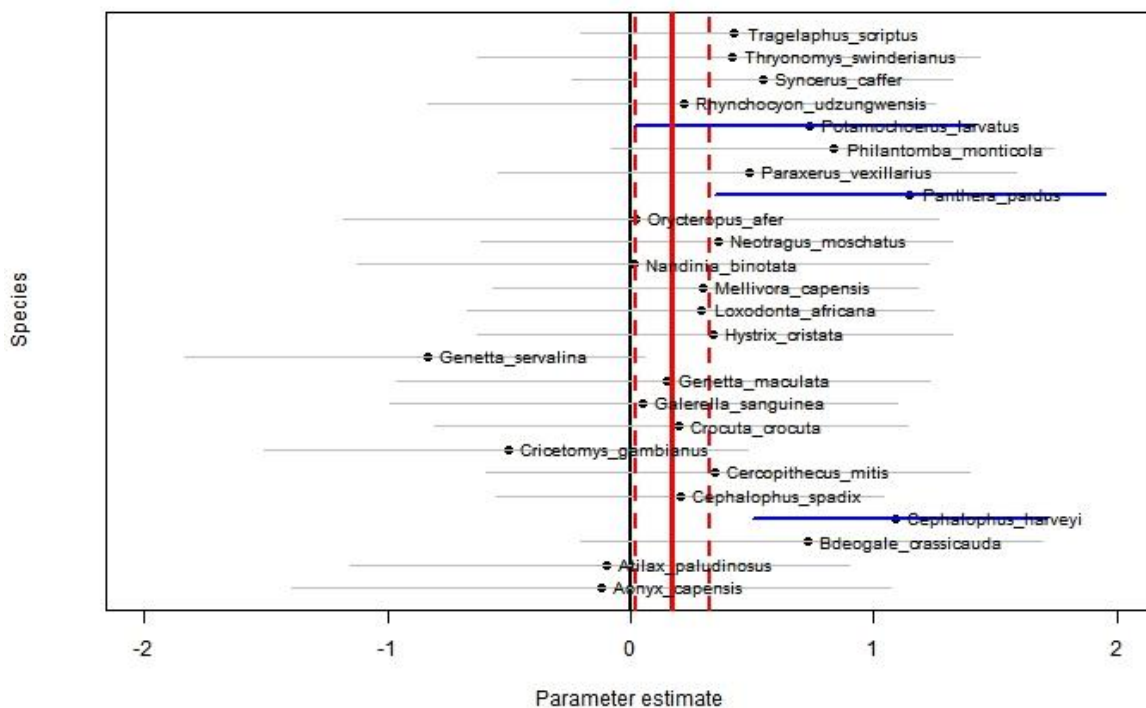

### Effect of dist. to settlements on MW detection

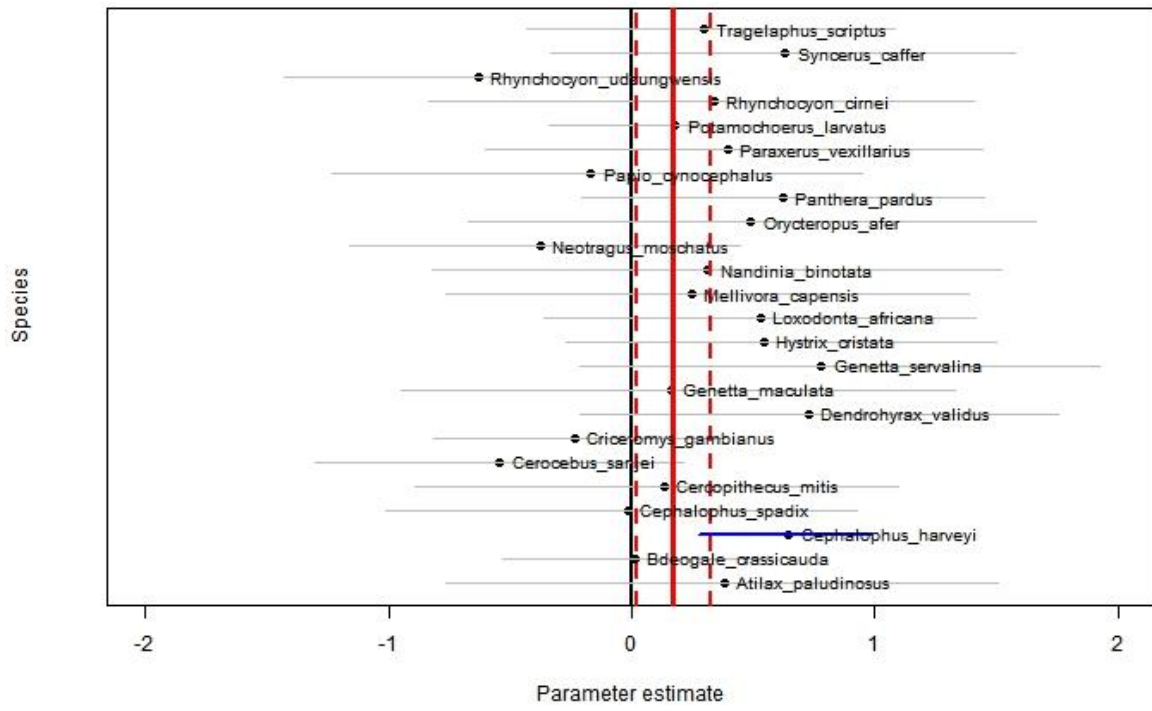

Supplement: pone.0215682.s004.pdf [file pone.0215682.s004.pdf]
