# Supplementary material for: A landscape-scale assessment of tropical mammals reveals the effects of habitat and anthropogenic disturbance on community occupancy
Source: PubMed Central journal article supplement (PMC6474625; doi:10.1371/journal.pone.0215682), 2019-04-19
Supplement: pone.0215682.s002.pdf [file pone.0215682.s002.pdf]

| Order                  | Latin name                       | Body mass (Kg) | Matundu | Mbatwa | Lumemo | Ndundulu | Mwanihana | Total events |
|------------------------|----------------------------------|----------------|---------|--------|--------|----------|-----------|--------------|
| Afrotheria<br>(n=6)    |                                  |                |         |        |        |          |           |              |
| 1                      | <i>Loxodonta africana</i>        | 3940.043       | 42      | 56     | 4      | 10       | 18        | 130          |
| 2                      | <i>Orycteropus afer</i>          | 52.350         | 20      | 6      | 1      | 7        | 1         | 35           |
| 3                      | <i>Dendrohyrax validus</i>       | 2.430          | 1       |        |        |          | 9         | 10           |
| 4                      | <i>Rhynchocyon udzungwensis</i>  | 0.750          |         |        |        | 15       | 33        | 48           |
| 5                      | <i>Rhynchocyon cirnei</i>        | 0.490          | 15      |        | 10     |          | 2         | 27           |
| 6                      | <i>Petrodromus tetradactylus</i> | 0.188          | 38      |        |        |          |           | 38           |
| Artiodactyla<br>(n=15) |                                  |                |         |        |        |          |           |              |
| 7                      | <i>Hippopotamus amphibius</i>    | 1417.490       | 15      | 2      |        |          |           | 17           |
| 8                      | <i>Syncerus caffer</i>           | 580.003        | 6       | 7      | 23     | 15       | 13        | 64           |
| 9                      | <i>Hippotragus niger</i>         | 227.499        |         | 1      |        |          |           | 1            |
| 10                     | <i>Tragelaphus strepiceros</i>   | 213.501        |         | 37     |        |          |           | 37           |
| 11                     | <i>Kobus ellipsiprymnus</i>      | 210.000        | 3       |        | 5      |          |           | 8            |
| 12                     | <i>Potamochoerus larvatus</i>    | 97.500         | 89      | 14     | 30     | 37       | 45        | 215          |

|                  |                               |        |     |     |    |    |     |     |
|------------------|-------------------------------|--------|-----|-----|----|----|-----|-----|
| 13               | <i>Phacochoerus africanus</i> | 82.500 |     | 6   | 2  |    |     | 8   |
| 14               | <i>Cephalophus spadix</i>     | 56.000 | 9   |     |    | 23 | 17  | 49  |
| 15               | <i>Tragelaphus scriptus</i>   | 43.250 | 31  | 104 | 60 | 28 | 49  | 272 |
| 16               | <i>Sylvicapra grimmia</i>     | 19.500 |     | 2   | 8  |    |     | 10  |
| 17               | <i>Cephalophus harveyi</i>    | 14.500 | 469 | 117 | 68 | 73 | 175 | 902 |
| 18               | <i>Oreotragus oreotragus</i>  | 13.000 |     | 7   |    |    |     | 7   |
| 19               | <i>Neotragus moschatus</i>    | 6.500  | 97  | 6   | 24 | 27 | 35  | 189 |
| 20               | <i>Philantomba monticola</i>  | 6.250  | 2   |     |    | 37 |     | 39  |
| 21               | <i>Madoqua kirkii thomasi</i> | 5.300  |     | 72  |    |    |     | 72  |
| Carnivora (n=18) |                               |        |     |     |    |    |     |     |
| 22               | <i>Crocuta crocuta</i>        | 63.000 | 51  | 9   | 48 | 6  |     | 114 |
| 23               | <i>Panthera pardus</i>        | 55.000 | 58  | 22  | 51 | 33 | 14  | 178 |
| 24               | <i>Aonyx capensis</i>         | 19.000 |     |     |    | 1  |     | 1   |
| 25               | <i>Caracal caracal</i>        | 13.750 |     | 1   |    |    |     | 1   |
| 26               | <i>Civettictis civetta</i>    | 12.000 |     | 34  | 2  |    |     | 36  |
| 27               | <i>Leptailurus serval</i>     | 12.000 |     | 2   | 1  |    |     | 3   |
| 28               | <i>Mellivora capensis</i>     | 9.000  | 18  | 15  | 3  | 9  | 5   | 50  |

|                 |                                |        |     |     |    |    |    |     |
|-----------------|--------------------------------|--------|-----|-----|----|----|----|-----|
| 29              | <i>Ichneumia albicauda</i>     | 3.500  |     | 47  |    |    |    | 47  |
| 30              | <i>Atilax paludinosus</i>      | 3.300  | 4   | 1   | 2  | 5  | 4  | 16  |
| 31              | <i>Rhynchogale melleri</i>     | 2.500  |     | 1   |    |    |    | 1   |
| 32              | <i>Genetta maculata</i>        | 2.225  | 48  |     | 27 | 2  | 2  | 79  |
| 33              | <i>Genetta genetta</i>         | 2.000  |     | 62  |    |    |    | 62  |
| 34              | <i>Nandinia binotata</i>       | 2.000  |     |     | 1  | 1  | 1  | 3   |
| 35              | <i>Mungos mungo</i>            | 1.925  | 2   | 2   |    |    |    | 4   |
| 36              | <i>Bdeogale crassicauda</i>    | 1.500  | 200 | 9   | 24 | 23 | 77 | 333 |
| 37              | <i>Genetta servalina lowei</i> | 1.055  |     |     |    | 28 | 14 | 42  |
| 38              | <i>Galerella sanguinea</i>     | 0.550  | 2   | 3   |    | 1  |    | 6   |
| 39              | <i>Helogale parvula</i>        | 0.300  | 15  | 1   |    |    |    | 16  |
| Pholidota (n=1) |                                |        |     |     |    |    |    |     |
| 40              | <i>Smutsia temminchii</i>      | 7.180  |     | 2   |    |    |    | 2   |
| Primates (n=4)  |                                |        |     |     |    |    |    |     |
| 41              | <i>Papio cynocephalus</i>      | 18.400 | 17  | 104 | 26 |    | 6  | 153 |
| 42              | <i>Cercocebus sanjei</i>       | 8.000  |     |     |    |    | 43 | 43  |
| 43              | <i>Cercopithecus mitis</i>     | 5.000  | 18  | 5   | 2  | 6  | 10 | 41  |

|                   |                                    |        |    |    |    |    |    |     |
|-------------------|------------------------------------|--------|----|----|----|----|----|-----|
| 44                | <i>Chlorocebus<br/>pygerythrus</i> | 4.155  |    | 20 |    |    |    | 20  |
| Rodentia<br>(n=4) |                                    |        |    |    |    |    |    |     |
| 45                | <i>Hystrix cristata</i>            | 20.000 | 20 | 71 | 33 | 6  | 8  | 138 |
| 46                | <i>Thryonomys<br/>swinderianus</i> | 4.060  | 1  |    |    | 4  |    | 5   |
| 47                | <i>Cricetomys<br/>gambianus</i>    | 1.285  | 27 |    | 22 | 28 | 47 | 124 |
| 48                | <i>Paraxerus<br/>vexillarius</i>   | 0.675  | 11 |    |    | 6  | 12 | 29  |
