# Supplementary material for: A landscape-scale assessment of tropical mammals reveals the effects of habitat and anthropogenic disturbance on community occupancy
Source: PubMed Central journal article supplement (PMC6474625; doi:10.1371/journal.pone.0215682), 2019-04-19

(a)

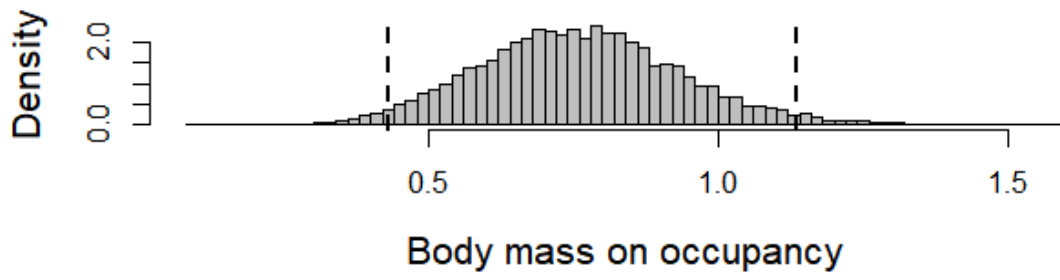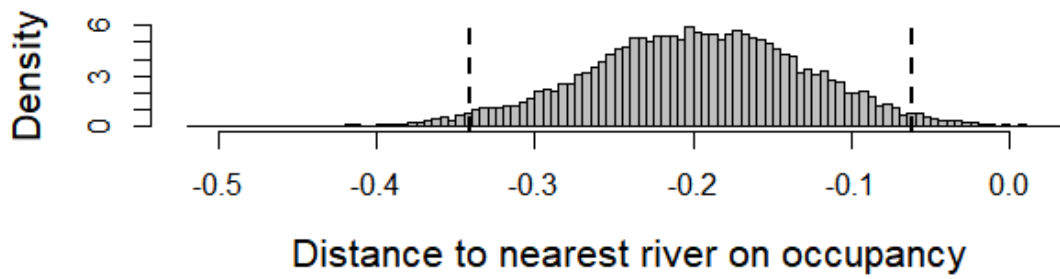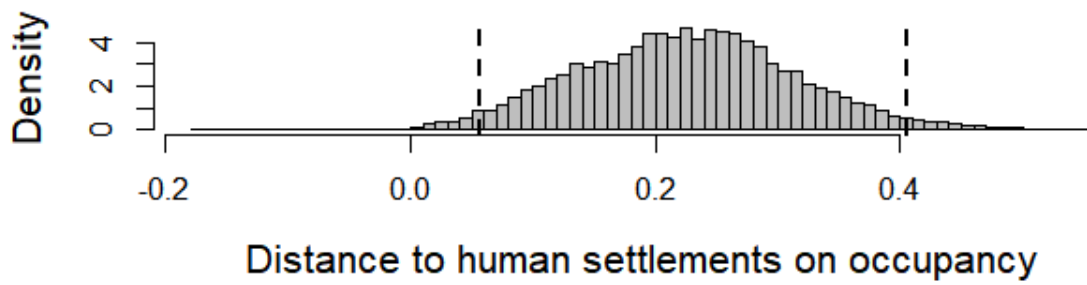

(b)

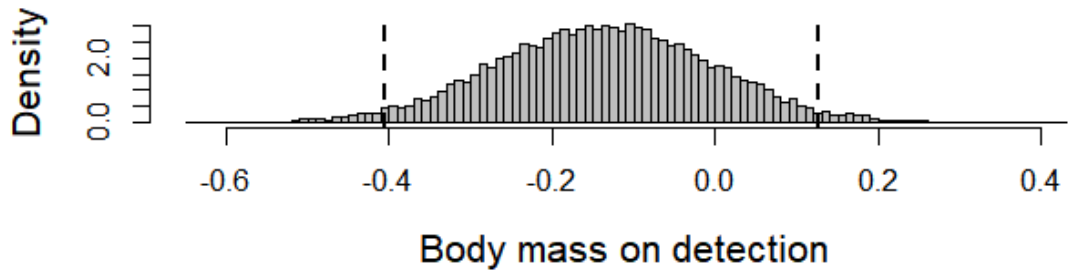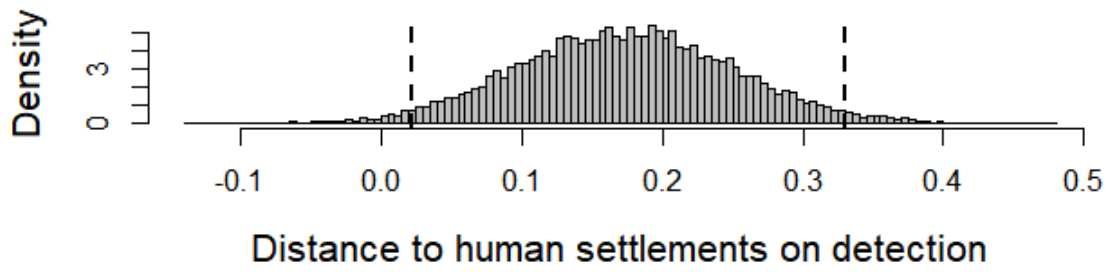

Supplement: pone.0215682.s003.pdf [file pone.0215682.s003.pdf]
